# Supplementary material for: Theoretical investigations of absorption and fluorescence spectra of protonated pyrene
Source: Royal Society of Chemistry journal article supplement (doi:10.1039/c6cp00327c), 2016-01-01
Supplement: c6cp00327c1.pdf [file c6cp00327c1.pdf]

## Electronic Supplementary Material (ESI)

### Supplementary Information

**Table S1** The bond angle parameters of three protonated pyrene isomers. Calculated values were obtained by the CASSCF(12,10)/cc-pVDZ methods for the ground and first excited states, respectively.

| Angles (°)      | 1H-P <sub>y</sub> <sup>+</sup> |                | 2H-P <sub>y</sub> <sup>+</sup> |                | 4H-P <sub>y</sub> <sup>+</sup> |                |
|-----------------|--------------------------------|----------------|--------------------------------|----------------|--------------------------------|----------------|
|                 | S <sub>0</sub>                 | S <sub>1</sub> | S <sub>0</sub>                 | S <sub>1</sub> | S <sub>0</sub>                 | S <sub>1</sub> |
| C5-C1-C2        | 116.2                          | 114.4          | 122.0                          | 122.1          | 120.5                          | 121.8          |
| C1-C2-C3        | 122.4                          | 122.6          | 116.8                          | 117.1          | 120.9                          | 119.3          |
| C2-C3-C7        | 121.1                          | 121.9          | 122.0                          | 122.1          | 120.5                          | 120.4          |
| C5-C4-C8        | 120.8                          | 121.6          | 120.8                          | 120.8          | 116.7                          | 114.9          |
| C4-C8-C9        | 121.2                          | 120.5          | 121.2                          | 120.8          | 123.1                          | 123.2          |
| C8-C9-C10       | 118.6                          | 118.7          | 119.3                          | 119.6          | 119.1                          | 119.8          |
| C9-C10-C6       | 120.0                          | 120.1          | 120.0                          | 119.9          | 121.1                          | 120.1          |
| C9-C10-C11      | 119.8                          | 119.7          | 119.9                          | 120.2          | 118.7                          | 119.8          |
| C10-C11-<br>C12 | 119.2                          | 119.1          | 118.9                          | 118.7          | 118.5                          | 120.1          |

**Table S2** The Cartesian coordinates (in Å) of the ground and first excited state optimized geometries of protonated pyrene isomers calculated by CASSCF(12,10)/cc-pVDZ level.

| Species                        | S <sub>0</sub> |           |           |          | S <sub>1</sub> |           |           |          |
|--------------------------------|----------------|-----------|-----------|----------|----------------|-----------|-----------|----------|
| 1H-P <sub>y</sub> <sup>+</sup> | C              | 1.243985  | 2.870638  | 0.000000 | C              | 1.211599  | 2.925399  | 0.000000 |
|                                | C              | -0.085683 | 3.534585  | 0.000000 | C              | -0.144857 | 3.536586  | 0.000000 |
|                                | C              | -1.244886 | 2.835476  | 0.000000 | C              | -1.315575 | 2.770944  | 0.000000 |
|                                | C              | -2.458836 | 0.665320  | 0.000000 | C              | -2.489976 | 0.595813  | 0.000000 |
|                                | C              | -1.244865 | 1.392449  | 0.000000 | C              | -1.283479 | 1.364562  | 0.000000 |
|                                | C              | 0.000000  | 0.674129  | 0.000000 | C              | 0.000000  | 0.683967  | 0.000000 |
|                                | C              | 1.234130  | 1.373500  | 0.000000 | C              | 1.215461  | 1.412788  | 0.000000 |
|                                | C              | 2.443478  | 0.649273  | 0.000000 | C              | 2.424932  | 0.710745  | 0.000000 |
|                                | C              | 2.440793  | -0.734684 | 0.000000 | C              | 2.460756  | -0.688457 | 0.000000 |

---

|   |           |           |           |   |           |           |           |
|---|-----------|-----------|-----------|---|-----------|-----------|-----------|
| C | 1.222248  | -1.468080 | 0.000000  | C | 1.263309  | -1.435244 | 0.000000  |
| C | -0.006906 | -0.749272 | 0.000000  | C | 0.018507  | -0.736073 | 0.000000  |
| C | -1.242851 | -1.460581 | 0.000000  | C | -1.217012 | -1.476452 | 0.000000  |
| C | -2.458746 | -0.716412 | 0.000000  | C | -2.460846 | -0.781888 | 0.000000  |
| C | 1.191887  | -2.884480 | 0.000000  | C | 1.254228  | -2.862897 | 0.000000  |
| C | -0.018087 | -3.575527 | 0.000000  | C | 0.039519  | -3.579482 | 0.000000  |
| C | -1.225991 | -2.871921 | 0.000000  | C | -1.170541 | -2.911521 | 0.000000  |
| H | 1.831082  | 3.234150  | 0.867659  | H | 1.780449  | 3.314553  | 0.870142  |
| H | 1.831082  | 3.234150  | -0.867659 | H | 1.780449  | 3.314553  | -0.870142 |
| H | -0.100608 | 4.626813  | 0.000000  | H | -0.218962 | 4.626555  | 0.000000  |
| H | -2.206105 | 3.352413  | 0.000000  | H | -2.282908 | 3.279857  | 0.000000  |
| H | -3.403416 | 1.211384  | 0.000000  | H | -3.446210 | 1.123885  | 0.000000  |

---

---

|                                |   |           |           |          |   |           |           |          |
|--------------------------------|---|-----------|-----------|----------|---|-----------|-----------|----------|
|                                | H | -3.407553 | -1.258028 | 0.000000 | H | -3.389592 | -1.354033 | 0.000000 |
|                                | H | -2.173143 | -3.415912 | 0.000000 | H | -2.110748 | -3.465571 | 0.000000 |
|                                | H | -0.023469 | -4.666073 | 0.000000 | H | 0.060315  | -4.670608 | 0.000000 |
|                                | H | 2.134844  | -3.435736 | 0.000000 | H | 2.204727  | -3.400082 | 0.000000 |
|                                | H | 3.387403  | -1.279656 | 0.000000 | H | 3.420484  | -1.208170 | 0.000000 |
|                                | H | 3.391867  | 1.190022  | 0.000000 | H | 3.365847  | 1.266323  | 0.000000 |
| 2H-P <sub>y</sub> <sup>+</sup> | C | 0.000000  | 0.000000  | 3.533510 | C | 0.000000  | 0.000000  | 3.603349 |
|                                | C | 0.000000  | 1.214823  | 2.849471 | C | 0.000000  | 1.195972  | 2.899825 |
|                                | C | 0.000000  | 1.243522  | 1.453908 | C | 0.000000  | 1.221028  | 1.473149 |
|                                | C | 0.000000  | 0.000000  | 0.734469 | C | 0.000000  | 0.000000  | 0.758503 |
|                                | C | 0.000000  | -1.243522 | 1.453908 | C | 0.000000  | -1.221028 | 1.473149 |
|                                | C | 0.000000  | -1.214823 | 2.849471 | C | 0.000000  | -1.195972 | 2.899825 |

---

---

|   |          |           |           |   |          |           |           |
|---|----------|-----------|-----------|---|----------|-----------|-----------|
| C | 0.000000 | 2.480089  | 0.720347  | C | 0.000000 | 2.426835  | 0.749815  |
| C | 0.000000 | 0.000000  | -0.669824 | C | 0.000000 | 0.000000  | -0.660562 |
| C | 0.000000 | 1.261108  | -1.384862 | C | 0.000000 | 1.228900  | -1.372964 |
| C | 0.000000 | 2.493815  | -0.632820 | C | 0.000000 | 2.427503  | -0.647007 |
| C | 0.000000 | 1.251804  | -2.754946 | C | 0.000000 | 1.246277  | -2.819756 |
| H | 0.000000 | 2.186532  | -3.305385 | H | 0.000000 | 2.210430  | -3.315418 |
| C | 0.000000 | 0.000000  | -3.526143 | C | 0.000000 | 0.000000  | -3.674143 |
| C | 0.000000 | -1.261108 | -1.384862 | C | 0.000000 | -1.228900 | -1.372964 |
| C | 0.000000 | -2.493815 | -0.632820 | C | 0.000000 | -2.427503 | -0.647007 |
| C | 0.000000 | -2.480089 | 0.720347  | C | 0.000000 | -2.426835 | 0.749815  |
| H | 0.000000 | -3.408927 | 1.278790  | H | 0.000000 | -3.370970 | 1.283415  |
| H | 0.000000 | -3.428771 | -1.180265 | H | 0.000000 | -3.372550 | -1.177325 |

---

---

|                                |   |           |           |           |  |   |           |           |           |
|--------------------------------|---|-----------|-----------|-----------|--|---|-----------|-----------|-----------|
|                                | H | 0.000000  | 3.408927  | 1.278790  |  | H | 0.000000  | 3.370970  | 1.283415  |
|                                | H | 0.000000  | 0.000000  | 4.617129  |  | H | 0.000000  | 0.000000  | 4.685261  |
|                                | H | 0.000000  | 2.146773  | 3.402124  |  | H | 0.000000  | 2.138616  | 3.437057  |
|                                | H | 0.000000  | -2.146773 | 3.402124  |  | H | 0.000000  | -2.138616 | 3.437057  |
|                                | H | 0.000000  | 3.428771  | -1.180265 |  | H | 0.000000  | 3.372550  | -1.177325 |
|                                | H | -0.855463 | 0.000000  | -4.226450 |  | H | -0.868564 | 0.000000  | -4.350175 |
|                                | C | 0.000000  | -1.251804 | -2.754946 |  | C | 0.000000  | -1.246277 | -2.819756 |
|                                | H | 0.000000  | -2.186532 | -3.305385 |  | H | 0.000000  | -2.210430 | -3.315418 |
|                                | H | 0.855463  | 0.000000  | -4.226450 |  | H | 0.868564  | 0.000000  | -4.350175 |
| 4H-P <sub>y</sub> <sup>+</sup> | C | -0.114116 | 3.551687  | 0.000000  |  | C | 0.074332  | 3.575830  | 0.000000  |
|                                | C | 1.117048  | 2.862969  | 0.000000  |  | C | 1.266615  | 2.874657  | 0.000000  |
|                                | C | 1.207142  | 1.458716  | 0.000000  |  | C | 1.249527  | 1.428636  | 0.000000  |

---

---

|   |           |           |          |   |           |           |          |
|---|-----------|-----------|----------|---|-----------|-----------|----------|
| C | 0.000000  | 0.698684  | 0.000000 | C | 0.005748  | 0.726486  | 0.000000 |
| C | -1.271850 | 1.406962  | 0.000000 | C | -1.229213 | 1.460300  | 0.000000 |
| C | -1.294851 | 2.840783  | 0.000000 | C | -1.151761 | 2.897838  | 0.000000 |
| C | 2.473263  | 0.776758  | 0.000000 | C | 2.443257  | 0.687743  | 0.000000 |
| C | 0.050123  | -0.722438 | 0.000000 | C | -0.009927 | -0.719616 | 0.000000 |
| C | 1.325224  | -1.379163 | 0.000000 | C | 1.223657  | -1.440617 | 0.000000 |
| C | 2.523899  | -0.585970 | 0.000000 | C | 2.434629  | -0.717637 | 0.000000 |
| C | 1.360389  | -2.787013 | 0.000000 | C | 1.213075  | -2.864354 | 0.000000 |
| H | 2.325481  | -3.297148 | 0.000000 | H | 2.163042  | -3.403298 | 0.000000 |
| C | 0.181298  | -3.522519 | 0.000000 | C | 0.004909  | -3.561312 | 0.000000 |
| C | -1.151208 | -1.495264 | 0.000000 | C | -1.219757 | -1.428553 | 0.000000 |
| C | -2.476950 | -0.789899 | 0.000000 | C | -2.538062 | -0.707434 | 0.000000 |

---

---

|   |           |           |           |   |           |           |           |
|---|-----------|-----------|-----------|---|-----------|-----------|-----------|
| C | -2.443043 | 0.681629  | 0.000000  | C | -2.440454 | 0.776789  | 0.000000  |
| H | -3.401428 | 1.210364  | 0.000000  | H | -3.373346 | 1.343224  | 0.000000  |
| H | -3.098191 | -1.108562 | 0.864145  | H | -3.140110 | -1.049391 | 0.868629  |
| H | 3.389483  | 1.369871  | 0.000000  | H | 3.400286  | 1.213500  | 0.000000  |
| H | -0.122338 | 4.642279  | 0.000000  | H | 0.082267  | 4.666935  | 0.000000  |
| H | 2.044471  | 3.442090  | 0.000000  | H | 2.226857  | 3.391716  | 0.000000  |
| H | -2.258885 | 3.353596  | 0.000000  | H | -2.084801 | 3.465240  | 0.000000  |
| H | 3.486410  | -1.101256 | 0.000000  | H | 3.383419  | -1.259144 | 0.000000  |
| H | 0.223201  | -4.613236 | 0.000000  | H | -0.002608 | -4.651827 | 0.000000  |
| C | -1.070764 | -2.880707 | 0.000000  | C | -1.192235 | -2.850999 | 0.000000  |
| H | -1.983630 | -3.480725 | 0.000000  | H | -2.140852 | -3.393267 | 0.000000  |
| H | -3.098191 | -1.108562 | -0.864145 | H | -3.140110 | -1.049392 | -0.868628 |

---



**Table S3** Vibrational frequencies ( $\text{cm}^{-1}$ ) and Huang-Rhys factors of the lowest excited state of 1H-Py<sup>+</sup> calculated at B3LYP/cc-pVDZ level of theory.

| 1H-Py <sup>+</sup> | Mode       | <sup>a</sup> Exp | <sup>b</sup> S <sub>0</sub>       | S <sub>1</sub>                    | Huang-Rhys factors (S) |
|--------------------|------------|------------------|-----------------------------------|-----------------------------------|------------------------|
| No                 |            |                  | S <sub>0</sub> ( <sup>1</sup> A') | S <sub>1</sub> ( <sup>1</sup> A') |                        |
| 1                  |            |                  | 96                                | 90                                | 0                      |
| 2                  |            |                  | 113                               | 97                                | 0                      |
| 3                  |            |                  | 191                               | 177                               | 0                      |
| 4                  |            |                  | 197                               | 206                               | 0                      |
| 5                  |            |                  | 250                               | 238                               | 0                      |
| 6                  |            |                  | 324                               | 313                               | 0                      |
| 7                  | $\nu_{50}$ | 327              | 340                               | 346                               | 0.0129                 |
| 8                  | $\nu_{49}$ | 394              | 396                               | 389                               | 0.0010                 |
| 9                  |            |                  | 402                               | 394                               | 0                      |
| 10                 | $\nu_{48}$ | 442              | 443                               | 446                               | 0.0695                 |
| 11                 |            |                  | 473                               | 475                               | 0                      |
| 12                 | $\nu_{47}$ | 476              | 481                               | 487                               | 0.0164                 |
| 13                 |            |                  | 487                               | 490                               | 0.0370                 |

---

|    |           |     |     |     |        |
|----|-----------|-----|-----|-----|--------|
| 14 |           |     | 500 | 494 | 0      |
| 15 |           |     | 520 | 521 | 0.0407 |
| 16 |           |     | 544 | 525 | 0      |
| 17 | $v_{44}$  | 579 | 580 | 586 | 0.0459 |
| 18 |           |     | 642 | 666 | 0      |
| 19 | $v_{43}$  | 666 | 666 | 673 | 0      |
| 20 |           |     | 670 | 676 | 0      |
| 21 | $v_{42}$  | 710 | 710 | 722 | 0.0452 |
| 22 |           |     | 747 | 726 | 0      |
| 23 |           |     | 773 | 763 | 0      |
| 24 | $v_{41}$  | 781 | 778 | 789 | 0.0043 |
| 25 | $v_{40}$  | 808 | 804 | 813 | 0.0087 |
| 26 |           |     | 809 | 827 | 0      |
| 27 | $2v_{48}$ | 888 | 867 | 846 | 0      |
| 28 |           |     | 874 | 887 | 0      |
| 29 |           |     | 896 | 905 | 0      |
| 30 | $v_{39}$  | 925 | 926 | 907 | 0.0001 |
| 31 |           |     | 944 | 917 | 0      |
| 32 |           | 965 | 957 | 963 | 0.0001 |

---

---

|    |          |      |      |      |        |
|----|----------|------|------|------|--------|
| 33 |          |      | 980  | 965  | 0      |
| 34 |          |      | 981  | 991  | 0.0049 |
| 35 |          |      | 988  | 992  | 0      |
| 36 |          |      | 993  | 999  | 0      |
| 37 | $v_{36}$ | 1055 | 1001 | 1009 | 0      |
| 38 |          |      | 1071 | 1086 | 0.0021 |
| 39 |          | 1126 | 1107 | 1130 | 0.0177 |
| 40 |          |      | 1124 | 1143 | 0.0063 |
| 41 |          |      | 1141 | 1153 | 0.0080 |
| 42 |          |      | 1147 | 1172 | 0      |
| 43 | $v_{32}$ | 1165 | 1156 | 1184 | 0.0610 |
| 44 |          |      | 1170 | 1191 | 0.0180 |
| 45 |          |      | 1184 | 1214 | 0.0992 |
| 46 | $v_{29}$ | 1230 | 1211 | 1230 | 0.1131 |
| 47 |          | 1248 | 1220 | 1238 | 0.0566 |
| 48 | $v_{27}$ | 1258 | 1230 | 1258 | 0.0228 |
| 49 |          | 1306 | 1303 | 1321 | 0.0043 |
| 50 |          |      | 1317 | 1345 | 0.0005 |
| 51 | $v_{23}$ | 1372 | 1343 | 1379 | 0.0107 |

---

---

|    |          |      |      |      |        |
|----|----------|------|------|------|--------|
| 52 |          |      | 1364 | 1390 | 0      |
| 53 |          |      | 1380 | 1403 | 0.0061 |
| 54 | $v_{21}$ | 1404 | 1394 | 1420 | 0.0152 |
| 55 |          | 1412 | 1406 | 1428 | 0.0054 |
| 56 |          |      | 1411 | 1445 | 0.0010 |
| 57 |          | 1466 | 1436 | 1456 | 0      |
| 58 | $v_{17}$ | 1480 | 1473 | 1471 | 0.0561 |
| 59 | $v_{16}$ | 1494 | 1491 | 1488 | 0.0110 |
| 60 | $v_{15}$ | 1519 | 1530 | 1510 | 0.1701 |
| 61 | $v_{14}$ | 1579 | 1561 | 1527 | 0.0014 |
| 62 | $v_{13}$ | 1606 | 1575 | 1565 | 0.0015 |
| 63 | $v_{12}$ | 1619 | 1602 | 1592 | 0.0003 |
| 64 |          | 1644 | 1625 | 1620 | 0.0718 |
| 65 |          | 1820 | 2904 | 2963 | 0.0001 |
| 66 |          | 1957 | 2922 | 2974 | 0      |
| 67 |          | 2222 | 3095 | 3186 | 0.0045 |
| 68 |          | 2335 | 3096 | 3187 | 0.0196 |
| 69 |          | 2834 | 3098 | 3194 | 0.0016 |
| 70 |          |      | 3099 | 3197 | 0.0017 |

---

---

|    |      |      |      |        |
|----|------|------|------|--------|
| 71 | 3047 | 3103 | 3202 | 0.0201 |
| 72 |      | 3109 | 3203 | 0.0013 |
| 73 |      | 3113 | 3206 | 0.0010 |
| 74 |      | 3115 | 3212 | 0.0053 |
| 75 |      | 3124 | 3217 | 0.0006 |

---

<sup>a</sup> From Ref. **14**. <sup>b</sup> NIST, (B3LYP/cc-pVDZ, 0.97)

**Table S4** Vibrational frequencies ( $\text{cm}^{-1}$ ) and Huang-Rhys factors of the lowest excited state of  $2\text{H-P}_y^+$  calculated at B3LYP/cc-pVDZ level of theory.

| No | 2H-P <sub>y</sub> <sup>+</sup> ( $\nu \cdot 0.97$ ) |                                   | Huang-Rhys factors |
|----|-----------------------------------------------------|-----------------------------------|--------------------|
|    | S <sub>0</sub> ( <sup>1</sup> A <sub>1</sub> )      | S <sub>1</sub> ( <sup>1</sup> A') | (S)                |
| 1  | 83                                                  | 88                                | 0                  |
| 2  | 140                                                 | 113                               | 0                  |
| 3  | 202                                                 | 127                               | 0                  |
| 4  | 215                                                 | 185                               | 0                  |
| 5  | 229                                                 | 216                               | 0                  |
| 6  | 288                                                 | 288                               | 0                  |
| 7  | 345                                                 | 298                               | 0                  |
| 8  | 370                                                 | 382                               | 0                  |
| 9  | 394                                                 | 455                               | 1.9346             |
| 10 | 437                                                 | 456                               | 0                  |
| 11 | 481                                                 | 463                               | 0.0047             |
| 12 | 488                                                 | 485                               | 0                  |
| 13 | 489                                                 | 490                               | 0                  |
| 14 | 501                                                 | 506                               | 0                  |

---

|    |     |     |        |
|----|-----|-----|--------|
| 15 | 514 | 511 | 0      |
| 16 | 529 | 529 | 0      |
| 17 | 567 | 536 | 0.0286 |
| 18 | 656 | 596 | 0      |
| 19 | 664 | 645 | 0.2945 |
| 20 | 674 | 677 | 0      |
| 21 | 717 | 690 | 0      |
| 22 | 734 | 696 | 0      |
| 23 | 770 | 697 | 0      |
| 24 | 771 | 779 | 0.1378 |
| 25 | 791 | 798 | 0      |
| 26 | 792 | 830 | 0.0012 |
| 27 | 839 | 866 | 0      |
| 28 | 848 | 871 | 0      |
| 29 | 873 | 899 | 0      |
| 30 | 921 | 911 | 0      |
| 31 | 938 | 954 | 0      |
| 32 | 940 | 964 | 0.2292 |
| 33 | 941 | 980 | 0      |

---

---

|    |      |      |        |
|----|------|------|--------|
| 34 | 983  | 996  | 0      |
| 35 | 983  | 1008 | 0      |
| 36 | 986  | 1014 | 0.0069 |
| 37 | 1001 | 1024 | 0      |
| 38 | 1040 | 1024 | 0      |
| 39 | 1070 | 1116 | 0.0047 |
| 40 | 1092 | 1134 | 0      |
| 41 | 1106 | 1155 | 0      |
| 42 | 1129 | 1168 | 0.0650 |
| 43 | 1149 | 1182 | 0      |
| 44 | 1163 | 1212 | 0      |
| 45 | 1197 | 1215 | 0      |
| 46 | 1219 | 1241 | 0.0467 |
| 47 | 1221 | 1257 | 0      |
| 48 | 1237 | 1282 | 0.1541 |
| 49 | 1248 | 1292 | 0.1045 |
| 50 | 1327 | 1354 | 0.0113 |
| 51 | 1327 | 1365 | 0      |
| 52 | 1353 | 1402 | 0      |

---



---

|    |      |      |        |
|----|------|------|--------|
| 53 | 1380 | 1403 | 0      |
| 54 | 1385 | 1442 | 0      |
| 55 | 1418 | 1451 | 0      |
| 56 | 1421 | 1462 | 0.0019 |
| 57 | 1428 | 1478 | 0.0028 |
| 58 | 1463 | 1491 | 0      |
| 59 | 1504 | 1506 | 0      |
| 60 | 1552 | 1548 | 0.0380 |
| 61 | 1556 | 1558 | 0      |
| 62 | 1598 | 1589 | 0.1545 |
| 63 | 1600 | 1642 | 0      |
| 64 | 1616 | 1666 | 0.2463 |
| 65 | 2881 | 2952 | 0.1299 |
| 66 | 2887 | 2966 | 0      |
| 67 | 3096 | 3180 | 0      |
| 68 | 3096 | 3182 | 0.0169 |
| 69 | 3098 | 3183 | 0.0001 |
| 70 | 3098 | 3183 | 0      |
| 71 | 3099 | 3186 | 0.0086 |

---

---

|    |      |      |        |
|----|------|------|--------|
| 72 | 3106 | 3187 | 0      |
| 73 | 3113 | 3196 | 0.0893 |
| 74 | 3113 | 3197 | 0      |
| 75 | 3117 | 3214 | 0.0259 |

---

NIST, (B3LYP/cc-pVDZ, 0.97)

**Table S5** Vibrational frequencies ( $\text{cm}^{-1}$ ) and Huang-Rhys factors of the lowest excited state of  $4\text{H-P}_y^+$  calculated at B3LYP/cc-pVDZ level of theory.

| No | 4H-P <sub>y</sub> <sup>+</sup>    |                                   | Huang-Rhys factors |
|----|-----------------------------------|-----------------------------------|--------------------|
|    | (ν*0.97)                          |                                   | (S)                |
|    | S <sub>0</sub> ( <sup>1</sup> A') | S <sub>1</sub> ( <sup>1</sup> A') | S                  |
| 1  | 81                                | 85                                | 0                  |
| 2  | 128                               | 124                               | 0                  |
| 3  | 185                               | 199                               | 0                  |
| 4  | 211                               | 208                               | 0                  |
| 5  | 245                               | 235                               | 0                  |
| 6  | 274                               | 299                               | 0                  |
| 7  | 342                               | 345                               | 0.0448             |
| 8  | 390                               | 390                               | 0.1411             |
| 9  | 421                               | 419                               | 0                  |
| 10 | 440                               | 442                               | 0.0449             |
| 11 | 466                               | 466                               | 0                  |
| 12 | 482                               | 488                               | 0.1561             |
| 13 | 490                               | 501                               | 0.0382             |
| 14 | 508                               | 517                               | 0                  |

---

|    |     |     |        |
|----|-----|-----|--------|
| 15 | 528 | 527 | 0      |
| 16 | 529 | 552 | 0.3912 |
| 17 | 567 | 589 | 0.0033 |
| 18 | 607 | 593 | 0      |
| 19 | 668 | 671 | 0.0007 |
| 20 | 709 | 706 | 0.0047 |
| 21 | 714 | 722 | 0      |
| 22 | 727 | 733 | 0      |
| 23 | 774 | 771 | 0.0077 |
| 24 | 779 | 788 | 0      |
| 25 | 785 | 809 | 0      |
| 26 | 792 | 812 | 0      |
| 27 | 846 | 853 | 0      |
| 28 | 862 | 878 | 0      |
| 29 | 914 | 893 | 0      |
| 30 | 924 | 934 | 0.0124 |
| 31 | 942 | 958 | 0      |
| 32 | 962 | 968 | 0      |
| 33 | 977 | 983 | 0.0013 |

---

---

|    |      |      |        |
|----|------|------|--------|
| 34 | 980  | 1000 | 0      |
| 35 | 994  | 1010 | 0      |
| 36 | 1002 | 1024 | 0      |
| 37 | 1029 | 1054 | 0.0053 |
| 38 | 1058 | 1089 | 0.0003 |
| 39 | 1077 | 1116 | 0.0170 |
| 40 | 1084 | 1121 | 0.0317 |
| 41 | 1137 | 1147 | 0.0580 |
| 42 | 1139 | 1169 | 0      |
| 43 | 1156 | 1186 | 0.0727 |
| 44 | 1163 | 1187 | 0.0086 |
| 45 | 1187 | 1202 | 0.0467 |
| 46 | 1213 | 1223 | 0.3561 |
| 47 | 1219 | 1229 | 0.2067 |
| 48 | 1232 | 1248 | 0.0507 |
| 49 | 1287 | 1318 | 0      |
| 50 | 1315 | 1339 | 0.0119 |
| 51 | 1320 | 1368 | 0.0663 |
| 52 | 1359 | 1379 | 0.0166 |

---

---

|    |      |      |        |
|----|------|------|--------|
| 53 | 1375 | 1391 | 0.0209 |
| 54 | 1397 | 1414 | 0.1603 |
| 55 | 1406 | 1426 | 0.0127 |
| 56 | 1415 | 1448 | 0.0077 |
| 57 | 1425 | 1465 | 0.0011 |
| 58 | 1466 | 1479 | 0.2634 |
| 59 | 1503 | 1497 | 0.2543 |
| 60 | 1537 | 1530 | 0.0900 |
| 61 | 1556 | 1550 | 0.0372 |
| 62 | 1586 | 1572 | 0.0222 |
| 63 | 1594 | 1581 | 0.0002 |
| 64 | 1621 | 1634 | 0.0796 |
| 65 | 2891 | 2954 | 0.0013 |
| 66 | 2900 | 2962 | 0      |
| 67 | 3083 | 3192 | 0.0205 |
| 68 | 3091 | 3194 | 0.0206 |
| 69 | 3092 | 3194 | 0.1394 |
| 70 | 3097 | 3200 | 0.0275 |
| 71 | 3101 | 3201 | 0.1090 |

---

---

|    |      |      |        |
|----|------|------|--------|
| 72 | 3104 | 3205 | 0.1815 |
| 73 | 3112 | 3208 | 0.0575 |
| 74 | 3117 | 3219 | 0.0009 |
| 75 | 3124 | 3222 | 0.0006 |

---

NIST, (B3LYP/cc-pVDZ, 0.97)
